# Supplementary material for: Ethnic inequalities in primary care for people with multiple long-term conditions: evidence from the General Practice Patient Survey
Source: bioRxiv or medRxiv preprint supplement (doi:10.1101/2024.03.31.24305132), 2024-04-01
Supplement: Supplementary file [file media-1.pdf]

### Supplementary Table 1: List of long-term conditions

- Alzheimer's disease or other cause of dementia
- Arthritis or ongoing problem with back or joints
- Autism or autism spectrum condition
- Blindness or partial sight
- A breathing condition, such as asthma or COPD
- Cancer (diagnosis or treatment in the last 5 years)
- Deafness or hearing loss
- Diabetes
- A heart condition, such as angina or atrial fibrillation
- High blood pressure
- Kidney or liver disease
- A learning disability
- A mental health condition
- A neurological condition, such as epilepsy
- A stroke (which affects your day-to-day life)
- Another long-term condition or disability

**Supplementary Table 2: Participants with complete versus missing ethnicity data**

|                                                    | <b>Complete ethnicity data</b> | <b>Missing ethnicity data</b> |
|----------------------------------------------------|--------------------------------|-------------------------------|
| <b>N</b>                                           | 294987                         | 2005                          |
| <b>Gender %</b>                                    |                                |                               |
| Male                                               | 48.41                          | 48.88                         |
| Female                                             | 51.59                          | 51.12                         |
| <b>Age Categories %</b>                            |                                |                               |
| 65+                                                | 60.9                           | 62.84                         |
| 55-64                                              | 21.47                          | 21.55                         |
| 45-54                                              | 10.51                          | 11.12                         |
| 35-44                                              | 4.02                           | 2.69                          |
| 16-34                                              | 3.1                            | 1.8                           |
| <b>Number of long-term conditions %</b>            |                                |                               |
| 2LTCs                                              | 52.83                          | 49.63                         |
| 3LTCs                                              | 27.22                          | 27.48                         |
| 4+LTCs                                             | 19.95                          | 22.89                         |
| <b>Practice size</b>                               |                                |                               |
| <3k                                                | 15.21                          | 16.61                         |
| 3k-5999                                            | 35.39                          | 37.81                         |
| 6k-8999                                            | 26.96                          | 25.29                         |
| 9k-11999                                           | 14.56                          | 12.72                         |
| 12k+                                               | 7.88                           | 7.58                          |
| <b>Area-deprivation %</b>                          |                                |                               |
| IMD_5: Least deprived                              | 13.93                          | 12.67                         |
| IMD_4                                              | 16.51                          | 16.71                         |
| IMD_3                                              | 19.34                          | 17.96                         |
| IMD_2                                              | 22.74                          | 22.34                         |
| IMD_1                                              | 27.48                          | 30.32                         |
| <b>Primary care experiences (mean)</b>             |                                |                               |
| Interaction with healthcare staff (scale of 0-100) | 85.71                          | 83.39                         |
| Accessing primary (scale of 0-100)                 | 79.92                          | 77.57                         |
| <b>Economic activity</b>                           |                                |                               |
| Retired                                            | 56.38                          | 56.56                         |
| Employed                                           | 24.46                          | 21.35                         |
| Unemployed                                         | 3.03                           | 3.89                          |
| long-term sick/disabled                            | 10.06                          | 11.77                         |
| Other                                              | 6.06                           | 6.43                          |

Supplementary Table 3. Demographic characteristics by ethnic group

| Ethnic Groups                  | N             | % Female    | % Aged 65 years and above | % with four or more LTCS | % Retired   | % Living in the most deprived IMD quintile | % in practices with 12k+ patients | Mean no. of Nurses | SD         | Mean no. of GPs | SD         | Mean Ethnic Density | SD          | Ethnic Density Range | Mean Area Life Expectancy | SD         |
|--------------------------------|---------------|-------------|---------------------------|--------------------------|-------------|--------------------------------------------|-----------------------------------|--------------------|------------|-----------------|------------|---------------------|-------------|----------------------|---------------------------|------------|
| Arab                           | 631           | 36.0        | 36.5                      | 27.1                     | 29.0        | 36.1                                       | 4.1                               | 1.4                | 1.3        | 3.8             | 3.1        | 3.3                 | 3.5         | 0 - 16.6             | 79.4                      | 3.9        |
| Asian: Bangladeshi             | 1053          | 43.0        | 26.7                      | 20.5                     | 20.9        | 53.6                                       | 4.0                               | 1.5                | 1.5        | 4.0             | 3.2        | 12.9                | 14.0        | 0 - 74               | 78.3                      | 3.4        |
| Asian: Chinese                 | 694           | 54.2        | 49.0                      | 12.7                     | 47.3        | 26.1                                       | 7.1                               | 1.8                | 1.9        | 4.4             | 3.2        | 1.6                 | 1.8         | 0 - 15.2             | 79.3                      | 3.5        |
| Asian: Indian                  | 6764          | 47.6        | 49.9                      | 21.3                     | 41.5        | 31.3                                       | 5.1                               | 1.5                | 1.5        | 3.7             | 2.9        | 18.7                | 18.5        | 0 - 83.2             | 78.7                      | 3.2        |
| Asian: Pakistani               | 3475          | 48.4        | 37.8                      | 25.2                     | 27.0        | 58.9                                       | 2.9                               | 1.5                | 1.6        | 3.4             | 2.8        | 24.6                | 21.7        | 0 - 79.7             | 77.1                      | 3.2        |
| Asian: Other Asian             | 2336          | 49.5        | 41.8                      | 17.9                     | 32.2        | 26.9                                       | 5.6                               | 1.5                | 1.6        | 4.0             | 3.1        | 5.1                 | 4.2         | 0.1 - 24.3           | 79.5                      | 3.0        |
| Black: African                 | 2584          | 53.3        | 29.9                      | 13.3                     | 23.5        | 48.7                                       | 4.6                               | 1.5                | 1.6        | 4.0             | 3.4        | 10.2                | 7.2         | 0 - 34.2             | 78.3                      | 3.0        |
| Black: Caribbean               | 3089          | 62.5        | 50.2                      | 21.0                     | 46.7        | 46.9                                       | 5.0                               | 1.6                | 1.7        | 4.1             | 3.4        | 5.1                 | 3.9         | 0 - 18.2             | 78.4                      | 3.0        |
| Black: Other                   | 476           | 54.4        | 23.5                      | 17.0                     | 21.6        | 44.8                                       | 2.9                               | 1.6                | 1.5        | 4.1             | 3.2        | 1.9                 | 1.5         | 0 - 6.6              | 78.3                      | 3.0        |
| Mixed: White & Asian           | 615           | 52.7        | 32.7                      | 19.5                     | 31.5        | 30.1                                       | 6.5                               | 2.0                | 1.9        | 4.7             | 3.4        | 1.1                 | 0.6         | 0.1 - 3.1            | 78.9                      | 3.4        |
| Mixed: White & Black African   | 290           | 56.2        | 24.5                      | 17.6                     | 20.0        | 42.8                                       | 7.6                               | 1.8                | 1.9        | 4.5             | 3.7        | 0.8                 | 0.5         | 0 - 2.8              | 78.5                      | 3.2        |
| Mixed: White & Black Caribbean | 600           | 59.5        | 22.3                      | 19.5                     | 19.7        | 44.3                                       | 6.3                               | 2.0                | 2.3        | 4.5             | 3.6        | 1.5                 | 1.0         | 0.1 - 6.3            | 78.1                      | 3.2        |
| Mixed: Other Mixed             | 635           | 61.3        | 26.8                      | 20.6                     | 24.1        | 32.0                                       | 7.2                               | 1.9                | 1.7        | 4.5             | 3.4        | 1.3                 | 0.9         | 0.1 - 3.5            | 79.1                      | 3.3        |
| Other Ethnic group             | 2431          | 45.2        | 44.0                      | 24.5                     | 34.3        | 35.8                                       | 5.7                               | 1.7                | 1.7        | 4.3             | 3.4        | 4.4                 | 3.1         | 0 - 16.1             | 79.1                      | 3.4        |
| White: British                 | 259543        | 51.6        | 63.2                      | 19.9                     | 59.1        | 26.1                                       | 8.2                               | 2.5                | 2.2        | 5.0             | 3.6        | 78.7                | 20.2        | 2.1 - 98.4           | 78.7                      | 3.3        |
| White: Gypsy & Irish Traveller | 91            | 48.4        | 28.6                      | 30.8                     | 26.4        | 39.6                                       | 4.4                               | 2.7                | 2.5        | 4.7             | 3.4        | 0.3                 | 0.4         | 0 - 2.6              | 78.1                      | 3.2        |
| White: Irish                   | 3408          | 50.4        | 70.2                      | 23.0                     | 61.9        | 31.3                                       | 7.4                               | 2.0                | 1.9        | 4.7             | 3.7        | 1.4                 | 1.0         | 0 - 5.6              | 78.8                      | 3.4        |
| White: Other                   | 6272          | 56.0        | 40.3                      | 16.4                     | 33.9        | 28.0                                       | 8.8                               | 2.1                | 2.0        | 4.8             | 3.5        | 12.1                | 8.1         | 0.4 - 42.2           | 79.4                      | 3.4        |
| <b>Total</b>                   | <b>294987</b> | <b>51.6</b> | <b>60.9</b>               | <b>20.0</b>              | <b>56.4</b> | <b>27.5</b>                                | <b>7.9</b>                        | <b>2.4</b>         | <b>2.1</b> | <b>4.9</b>      | <b>3.6</b> | <b>70.6</b>         | <b>29.5</b> | <b>0 - 98.4</b>      | <b>78.7</b>               | <b>3.3</b> |

Supplementary Table 4. Responses to questions about experience of interacting with healthcare provider and accessing primary care by ethnic group

| Ethnic Groups                  | Variables used to create composite variable for experience of interaction with healthcare professionals (HCPs) |                                               |                                  |                                              |                                        |                                            | Used to create composite variable for experience of accessing primary care |                                                      |                                   |
|--------------------------------|----------------------------------------------------------------------------------------------------------------|-----------------------------------------------|----------------------------------|----------------------------------------------|----------------------------------------|--------------------------------------------|----------------------------------------------------------------------------|------------------------------------------------------|-----------------------------------|
|                                | Needs met? Yes definitely                                                                                      | Trust and confidence in HCP? %Yes definitely. | Felt involved? %Yes, definitely. | % reporting HCP very good at showing concern | % reporting HCP very good at listening | % reporting HCP very good at being patient | % Very satisfied with appointment times available                          | % Very satisfied with appointment booking experience | % Satisfied with appointment type |
| Arab                           | 58.2                                                                                                           | 67.5                                          | 54.5                             | 57.2                                         | 58.5                                   | 53.9                                       | 29.0                                                                       | 69.3                                                 | 30.6                              |
| Asian: Bangladeshi             | 51.4                                                                                                           | 59.1                                          | 47.3                             | 40.7                                         | 42.6                                   | 36.9                                       | 21.8                                                                       | 63.8                                                 | 21.7                              |
| Asian: Chinese                 | 54.0                                                                                                           | 58.9                                          | 48.4                             | 47.8                                         | 44.5                                   | 42.8                                       | 25.2                                                                       | 76.2                                                 | 23.9                              |
| Asian: Indian                  | 55.8                                                                                                           | 63.4                                          | 49.6                             | 46.5                                         | 46.3                                   | 42.4                                       | 23.5                                                                       | 67.7                                                 | 22.7                              |
| Asian: Pakistani               | 52.3                                                                                                           | 58.7                                          | 47.2                             | 42.3                                         | 43.1                                   | 39.1                                       | 21.1                                                                       | 63.4                                                 | 20.7                              |
| Asian: Other Asian             | 58.6                                                                                                           | 65.9                                          | 52.6                             | 48.1                                         | 48.2                                   | 43.1                                       | 27.6                                                                       | 74.7                                                 | 27.5                              |
| Black: African                 | 61.8                                                                                                           | 72.4                                          | 56.2                             | 58.9                                         | 58.9                                   | 52.1                                       | 35.5                                                                       | 72.4                                                 | 39.9                              |
| Black: Caribbean               | 62.7                                                                                                           | 70.9                                          | 57.4                             | 56.8                                         | 55.8                                   | 49.4                                       | 33.7                                                                       | 77.4                                                 | 32.8                              |
| Black: Other                   | 58.2                                                                                                           | 66.0                                          | 51.5                             | 52.9                                         | 53.2                                   | 47.3                                       | 31.9                                                                       | 70.8                                                 | 100.0                             |
| Mixed: White & Asian           | 61.6                                                                                                           | 68.8                                          | 58.5                             | 56.6                                         | 54.3                                   | 52.9                                       | 30.4                                                                       | 69.3                                                 | 24.6                              |
| Mixed: White & Black African   | 57.9                                                                                                           | 67.2                                          | 53.1                             | 53.1                                         | 57.6                                   | 53.1                                       | 36.6                                                                       | 75.9                                                 | 34.5                              |
| Mixed: White & Black Caribbean | 58.3                                                                                                           | 65.7                                          | 56.7                             | 57.8                                         | 57.7                                   | 53.7                                       | 33.7                                                                       | 68.7                                                 | 29.8                              |
| Mixed: Other Mixed             | 60.0                                                                                                           | 68.7                                          | 61.3                             | 60.6                                         | 59.1                                   | 54.8                                       | 31.8                                                                       | 71.3                                                 | 26.9                              |
| Other Ethnic group             | 58.8                                                                                                           | 64.2                                          | 54.1                             | 52.9                                         | 53.2                                   | 46.7                                       | 30.2                                                                       | 72.9                                                 | 32.4                              |
| White: British                 | 69.7                                                                                                           | 77.0                                          | 67.1                             | 65.0                                         | 63.7                                   | 60.5                                       | 39.0                                                                       | 80.6                                                 | 33.4                              |
| White: Gypsy & Irish Traveller | 57.1                                                                                                           | 62.6                                          | 48.4                             | 53.9                                         | 52.8                                   | 48.4                                       | 27.5                                                                       | 67.0                                                 | 100.0                             |
| White: Irish                   | 72.9                                                                                                           | 77.9                                          | 68.4                             | 66.6                                         | 63.9                                   | 62.4                                       | 43.0                                                                       | 80.4                                                 | 40.4                              |
| White: Other                   | 59.1                                                                                                           | 65.6                                          | 56.0                             | 54.4                                         | 53.9                                   | 49.0                                       | 30.8                                                                       | 72.7                                                 | 26.3                              |
| <b>Total</b>                   | <b>68.4</b>                                                                                                    | <b>75.7</b>                                   | <b>65.6</b>                      | <b>63.5</b>                                  | <b>62.4</b>                            | <b>59.0</b>                                | <b>37.9</b>                                                                | <b>79.5</b>                                          | <b>32.8</b>                       |

Supplementary Table 5: Regression models showing levels of satisfaction with access to primary care for people with and without MLTCs that includes a mental health condition. *Models adjusted for demographic, practice and area-level factors*

|                                 |                                | Model includes participants with a mental health condition |              | Model includes participants with physical health conditions |         |
|---------------------------------|--------------------------------|------------------------------------------------------------|--------------|-------------------------------------------------------------|---------|
|                                 |                                | Regression Coefficients                                    | SE           | Regression Coefficients                                     | SE      |
| Ethnicity:                      | <i>White British</i>           | <i>Reference</i>                                           |              | <i>Reference</i>                                            |         |
|                                 | Arab                           | -4.08                                                      | (2.15)       | -2.76**                                                     | (0.90)  |
|                                 | Asian: Bangladeshi             | -6.18**                                                    | (1.88)       | -5.37***                                                    | (0.69)  |
|                                 | Asian: Chinese                 | 0.37                                                       | (2.89)       | -2.52**                                                     | (0.80)  |
|                                 | Asian: Indian                  | -5.39***                                                   | (0.97)       | -4.79***                                                    | (0.31)  |
|                                 | Asian: Pakistani               | -6.77***                                                   | (1.07)       | -7.07***                                                    | (0.41)  |
|                                 | Asian: Other Asian             | -0.72                                                      | (1.38)       | -0.89                                                       | (0.48)  |
|                                 | Black: African                 | 5.78***                                                    | (1.42)       | 3.76***                                                     | (0.45)  |
|                                 | Black: Caribbean               | 0.90                                                       | (1.25)       | 1.49***                                                     | (0.42)  |
|                                 | Black: Other                   | 3.90                                                       | (2.29)       | -0.26                                                       | (1.02)  |
|                                 | Mixed: White & Asian           | -0.72                                                      | (1.77)       | -2.48**                                                     | (0.95)  |
|                                 | Mixed: White & Black African   | 5.62*                                                      | (2.42)       | 1.07                                                        | (1.38)  |
|                                 | Mixed: White & Black Caribbean | -2.01                                                      | (1.61)       | 0.36                                                        | (1.01)  |
|                                 | Mixed: Other Mixed             | 0.59                                                       | (1.67)       | -0.69                                                       | (0.95)  |
|                                 | Other Ethnic group             | -0.40                                                      | (1.16)       | -1.14*                                                      | (0.48)  |
|                                 | White: Gypsy & Irish Traveller | -6.76                                                      | (3.70)       | 1.11                                                        | (2.65)  |
|                                 | White: Irish                   | 3.44**                                                     | (1.12)       | 1.68***                                                     | (0.43)  |
| White: Other                    | -0.78                          | (0.77)                                                     | -1.16***     | (0.34)                                                      |         |
| Age categories:                 | <i>65+</i>                     | <i>Reference</i>                                           |              | <i>Reference</i>                                            |         |
|                                 | 55-64                          | -2.26***                                                   | (0.41)       | -4.41***                                                    | (0.13)  |
|                                 | 45-54                          | -4.11***                                                   | (0.45)       | -6.28***                                                    | (0.18)  |
|                                 | 35-44                          | -4.99***                                                   | (0.50)       | -6.89***                                                    | (0.27)  |
|                                 | 16-34                          | -7.65***                                                   | (0.51)       | -8.62***                                                    | (0.33)  |
| Gender:                         | <i>Male</i>                    | <i>Reference</i>                                           |              | <i>Reference</i>                                            |         |
|                                 | Female                         | -1.14***                                                   | (0.22)       | -0.79***                                                    | (0.08)  |
| Economic Activity:              | <i>Retired</i>                 | <i>Reference</i>                                           |              | <i>Reference</i>                                            |         |
|                                 | Employed                       | -4.12***                                                   | (0.44)       | -3.78***                                                    | (0.13)  |
|                                 | Unemployed                     | 1.14*                                                      | (0.55)       | 1.36***                                                     | (0.29)  |
|                                 | Long-Term sick/disabled        | -0.62                                                      | (0.43)       | -0.17                                                       | (0.17)  |
|                                 | Other                          | -1.22*                                                     | (0.52)       | -0.93***                                                    | (0.18)  |
|                                 | Full-Time Equivalent GPs       | 0.50***                                                    | (0.06)       | 0.22***                                                     | (0.03)  |
| Full-Time Equivalent Nurses     | -0.73***                       | (0.09)                                                     | -0.42***     | (0.05)                                                      |         |
| Practice size:                  | <i>3k-5999</i>                 | <i>Reference</i>                                           |              |                                                             |         |
|                                 | <3k                            | 4.32***                                                    | (0.44)       | 3.75***                                                     | (0.26)  |
|                                 | 6k-8999                        | -3.33***                                                   | (0.38)       | -2.69***                                                    | (0.22)  |
|                                 | 9k-11999                       | -5.37***                                                   | (0.52)       | -4.04***                                                    | (0.30)  |
|                                 | 12k+                           | -6.56***                                                   | (0.76)       | -5.58***                                                    | (0.43)  |
| Area deprivation:               | <i>Least deprived quintile</i> | <i>Reference</i>                                           |              |                                                             |         |
|                                 | IMD 4                          | -1.01                                                      | (0.54)       | -0.89**                                                     | (0.33)  |
|                                 | IMD 3                          | -0.89                                                      | (0.54)       | -0.90**                                                     | (0.33)  |
|                                 | IMD 2                          | -1.97***                                                   | (0.56)       | -1.87***                                                    | (0.34)  |
|                                 | IMD 1                          | -3.01***                                                   | (0.63)       | -2.46***                                                    | (0.39)  |
|                                 | Ethnic Density                 | 0.018**                                                    | (0.01)       | 0.0082*                                                     | (0.00)  |
|                                 | Area Life expectancy           | 0.16**                                                     | (0.06)       | 0.19***                                                     | (0.04)  |
|                                 |                                | <b>N</b>                                                   | <b>45584</b> | <b>249403</b>                                               |         |
| ICC: Area <sup>a</sup>          |                                | 0.17                                                       | (0.004)      | 0.02                                                        | (0.002) |
| ICC Practice: Area <sup>a</sup> |                                | 0.10                                                       | (0.004)      | 0.11                                                        | (0.002) |

Supplementary Table 6: Regression models showing levels of satisfaction with healthcare provider interaction for people with and without MLTCs that includes a mental health condition. *Models adjusted for demographic, practice and area-level factors.*

|                                 |                                | Model includes participants with a mental health condition |              | Model include participants with physical health conditions |         |
|---------------------------------|--------------------------------|------------------------------------------------------------|--------------|------------------------------------------------------------|---------|
|                                 |                                | Regression Coefficients                                    | SE           | Regression Coefficients                                    | SE      |
| Ethnicity:                      | <i>White British</i>           | <i>Reference</i>                                           |              | <i>Reference</i>                                           |         |
|                                 | Arab                           | -3.43                                                      | (2.04)       | -3.06***                                                   | (0.81)  |
|                                 | Asian: Bangladeshi             | -6.02***                                                   | (1.78)       | -6.59***                                                   | (0.62)  |
|                                 | Asian: Chinese                 | -0.77                                                      | (2.76)       | -6.47***                                                   | (0.72)  |
|                                 | Asian: Indian                  | -5.92***                                                   | (0.91)       | -5.18***                                                   | (0.28)  |
|                                 | Asian: Pakistani               | -6.77***                                                   | (1.00)       | -7.10***                                                   | (0.36)  |
|                                 | Asian: Other Asian             | -4.30**                                                    | (1.31)       | -4.40***                                                   | (0.43)  |
|                                 | Black: African                 | 1.04                                                       | (1.35)       | 0.45                                                       | (0.40)  |
|                                 | Black: Caribbean               | -1.81                                                      | (1.18)       | -0.98**                                                    | (0.38)  |
|                                 | Black: Other                   | -0.71                                                      | (2.18)       | -2.09*                                                     | (0.92)  |
|                                 | Mixed: White & Asian           | -0.97                                                      | (1.68)       | -1.73*                                                     | (0.86)  |
|                                 | Mixed: White & Black African   | -0.93                                                      | (2.31)       | -2.68*                                                     | (1.25)  |
|                                 | Mixed: White & Black Caribbean | -0.60                                                      | (1.53)       | -1.52                                                      | (0.92)  |
|                                 | Mixed: Other Mixed             | -0.96                                                      | (1.59)       | -0.52                                                      | (0.86)  |
|                                 | Other Ethnic group             | -2.11                                                      | (1.10)       | -4.57***                                                   | (0.43)  |
|                                 | White: Gypsy & Irish Traveller | -3.97                                                      | (3.53)       | -4.75*                                                     | (2.41)  |
|                                 | White: Irish                   | 1.60                                                       | (1.06)       | 1.47***                                                    | (0.38)  |
|                                 | White: Other                   | -2.93***                                                   | (0.72)       | -4.38***                                                   | (0.30)  |
| Age categories:                 | <i>65+</i>                     | <i>Reference</i>                                           |              | <i>Reference</i>                                           |         |
|                                 | 55-64                          | -0.62                                                      | (0.39)       | -1.84***                                                   | (0.12)  |
|                                 | 45-54                          | -2.20***                                                   | (0.43)       | -3.39***                                                   | (0.16)  |
|                                 | 35-44                          | -4.03***                                                   | (0.48)       | -5.24***                                                   | (0.25)  |
|                                 | 16-34                          | -7.82***                                                   | (0.49)       | -7.04***                                                   | (0.30)  |
| Gender:                         | <i>Male</i>                    | <i>Reference</i>                                           |              | <i>Reference</i>                                           |         |
|                                 | Female                         | 0.62**                                                     | (0.21)       | -0.66***                                                   | (0.07)  |
| Economic Activity:              | <i>Retired</i>                 | <i>Reference</i>                                           |              | <i>Reference</i>                                           |         |
|                                 | Employed                       | -0.55                                                      | (0.42)       | -1.44***                                                   | (0.12)  |
|                                 | Unemployed                     | -1.22*                                                     | (0.52)       | -0.94***                                                   | (0.27)  |
|                                 | Long-Term sick/disabled        | -1.30**                                                    | (0.41)       | -0.65***                                                   | (0.16)  |
|                                 | Other                          | -1.22*                                                     | (0.49)       | -0.72***                                                   | (0.17)  |
|                                 | Full-Time Equivalent GPs       | 0.60***                                                    | (0.05)       | 0.29***                                                    | (0.02)  |
|                                 | Full-Time Equivalent Nurses    | -0.38***                                                   | (0.07)       | -0.21***                                                   | (0.04)  |
| Practice size:                  | <i>3k-5999</i>                 | <i>Reference</i>                                           |              |                                                            |         |
|                                 | <3k                            | 0.34                                                       | (0.37)       | 0.77***                                                    | (0.17)  |
|                                 | 6k-8999                        | -1.28***                                                   | (0.32)       | -0.76***                                                   | (0.15)  |
|                                 | 9k-11999                       | -3.01***                                                   | (0.43)       | -1.43***                                                   | (0.21)  |
|                                 | 12k+                           | -4.02***                                                   | (0.63)       | -2.56***                                                   | (0.30)  |
| Area deprivation:               | <i>Least deprived quintile</i> | <i>Reference</i>                                           |              |                                                            |         |
|                                 | IMD 4                          | -0.039                                                     | (0.45)       | -0.35                                                      | (0.21)  |
|                                 | IMD 3                          | -0.40                                                      | (0.45)       | -0.60**                                                    | (0.21)  |
|                                 | IMD 2                          | -1.01*                                                     | (0.46)       | -1.39***                                                   | (0.22)  |
|                                 | IMD 1                          | -1.87***                                                   | (0.52)       | -1.67***                                                   | (0.26)  |
|                                 | Ethnic Density                 | 0.023***                                                   | (0.01)       | 0.13***                                                    | (0.03)  |
|                                 | Area Life expectancy           | 0.12*                                                      | (0.05)       | 78.2***                                                    | (2.20)  |
|                                 |                                | <b>N</b>                                                   | <b>45584</b> | <b>249403</b>                                              |         |
| ICC: Area <sup>a</sup>          |                                | 0.007                                                      | (0.003)      | 0.014                                                      | (0.001) |
| ICC Practice: Area <sup>a</sup> |                                | 0.043                                                      | (0.003)      | 0.043                                                      | (0.001) |
